# Supplementary material for: Wnt/β-Catenin Signaling Pathway Is Strongly Implicated in Cadmium-Induced Developmental Neurotoxicity and Neuroinflammation: Clues from Zebrafish Neurobehavior and In Vivo Neuroimaging
Source: MDPI journal article supplement (doi:10.3390/ijms231911434), 2022-09-28
Supplement: s1 [file s1]

## **Supplementary Material**

### **Wnt/ $\beta$ -Catenin Signaling Pathway Is Strongly Implicated in Cadmium-induced Developmental Neurotoxicity and Neuroinflammation: Clues from Zebrafish Neurobehavior and In Vivo Neuroimaging**

Yanyi Xu <sup>†</sup>, Junru Liu <sup>†</sup>, Yonghui Tian, Zuo Wang, Zan Song, Kemin Li,

Shengxiang Zhang and Haiyu Zhao\*

School of Life Sciences, Gansu Key Laboratory of Biomonitoring and Bioremediation for Environmental Pollution, Lanzhou University, No. 222 South Tianshui Road, Lanzhou 730000, China.

\* Correspondence: zhaohy@lzu.edu.cn; Tel.: +86 18153646061

<sup>†</sup> These authors contributed equally to this work

**Table S1.** Primers used for qRT-PCR analysis.

|                                     | Gene name         | Sequences of the primers (5' – 3') |
|-------------------------------------|-------------------|------------------------------------|
| Reference gene                      | <i>β-actin</i>    | F: CACTGAGGCTCCCCTGAATCCC          |
|                                     |                   | R: CGTACAGAGAGAGCACAGCCTGG         |
| Neurodevelopment related genes      | <i>α1-tubulin</i> | F: AATCACCAATGCTTGCTTCGAGCC        |
|                                     |                   | R: TTCACGTCTTTGGGTACCACGTCA        |
|                                     | <i>syn2a</i>      | F: GTGACCATGCCAGCATTTTC            |
|                                     |                   | R: TGGTTCTCCACTTTCACCTT            |
|                                     | <i>elav13</i>     | F: AGACAAGATCACAGGCCAGAGCTT        |
|                                     |                   | R: TGGTCTGCAGTTTGAGACCGTTGA        |
|                                     | <i>nestin</i>     | F: CTTCAACATCTTCAGGCCCAAG          |
|                                     |                   | R: GTGTTGGTCTGTGATTCTCAG           |
|                                     | <i>gap43</i>      | F: GCAGCAGGAAGTGGAGAAGCCA          |
|                                     |                   | R: GGATTCCTCAGCAGCGTCTGGT          |
| Apoptosis related genes             | <i>bcl</i>        | F: AACCCAAATTCTGCGCAACG            |
|                                     |                   | R: ATCTACCTGGGACGCCATCT            |
|                                     | <i>p53</i>        | F: GGGCAATCAGCGAGCAAA              |
|                                     |                   | R: ACTGACCTTCCTGAGTCTCCA           |
|                                     | <i>bax</i>        | F: GGCTATTTCAACCAGGGTTCC           |
|                                     |                   | R: TGCGAATCACCAATGCTGT             |
|                                     | <i>caspase-3a</i> | F: GTTCTTTATTCAGGCTTGTCGAG         |
|                                     |                   | R: TTTCTCCAGGAGTAATAACCTGG         |
|                                     | <i>caspase-8</i>  | F: TGTCTCAGCCTATAGAAAGATGC         |
|                                     |                   | R: AAATGAAGTAGATCTTCCCAGCT         |
|                                     | <i>irf8</i>       | F: CAAAAGCCCAGATTTTGAGG            |
|                                     |                   | R: TCTTTTACGGTGGTGACTGT            |
|                                     | <i>apoeb</i>      | F: GCAGATGACGTGAAGAACCG            |
|                                     |                   | R: GTTGCTACGGTGTTGCGGAT            |
|                                     | <i>tnf-a</i>      | F: TCACGCTCCATAAGACCCAG            |
|                                     |                   | R: GATGTGCAAAGACACCTGGC            |
| Wnt signaling pathway related genes | <i>Wnt4a</i>      | CAATGCGAGCAACTGGCTATAC             |
|                                     |                   | AATGCAGCTTCCCTCGTACCTT             |
|                                     | <i>β-catenin</i>  | GGAGCTCACCAGCTCTCTGT               |
|                                     |                   | TAGCTTGGGTCGTCCTGTCT               |
|                                     | <i>gsk3β</i>      | TCTGCTCACCGTTTCCTTTC               |
|                                     |                   | CTCCGACCCACTTAACTCCA               |
|                                     | <i>Wnt10b</i>     | TCCTGAAACAGGCTCGAAGT               |
|                                     |                   | GCTGCTCACTTGACACA                  |
|                                     | <i>ddk1</i>       | ATGCCAGAGACACTAAATGAACA            |
|                                     |                   | TATGAAGGAAACCAAGTTGAAAA            |

|  |              |                          |
|--|--------------|--------------------------|
|  | <i>lef1</i>  | AATGATCCCGTTCAAAGACG     |
|  |              | CGCTAAGTCTCCCTCCTCCT     |
|  | <i>axin2</i> | AGCACTGGAGAAAGGCTACAGGTC |
|  |              | GGAGTCATCCGTCAGTGCATC    |
|  | <i>ccnd</i>  | CGTGT CAGGAACAGATCGAG    |
|  |              | TCAAATGTTAATGTCTCTGACGT  |
|  | <i>myca</i>  | AGAAAGCTGGAGTCCTCGAC     |
|  |              | CTGCTGCAGTGTGTT CAGC     |
|  | <i>Sp51</i>  | GGAGGTCACGTTGAGGATGG     |
|  |              | GCGACAGCGACGAGTAGAGC     |

**Table S2.** Detailed statistical information in this study.

| Experiment (Figure)                                                                     | Test method       |                                | Significance |                 | N |
|-----------------------------------------------------------------------------------------|-------------------|--------------------------------|--------------|-----------------|---|
| <b>β-catenin expression (Figure. 1B)</b>                                                |                   | One-way ANOVA                  | ***          | F=42.14 P<0.001 | 3 |
|                                                                                         | CTRL              | Dunnett's multiple comparisons |              |                 |   |
|                                                                                         | 100 ug/L vs. CTRL | -                              | ***          | <0.001          |   |
|                                                                                         | 200 ug/L vs. CTRL | -                              | ***          | <0.001          |   |
| <b>Wnt signaling pathway related genes (Figure. 1C)</b>                                 | <i>wnt4a</i>      | One-way ANOVA                  | *            | F=8.252 P=0.019 | 3 |
|                                                                                         | 100 ug/L vs. CTRL | Dunnett's multiple comparisons | ns           | 0.998           |   |
|                                                                                         | 200 ug/L vs. CTRL | -                              | *            | 0.023           |   |
|                                                                                         | <i>wnt10b</i>     | One-way ANOVA                  | **           | F=108.4 P=0.002 |   |
|                                                                                         | 100 ug/L vs. CTRL | Dunnett's multiple comparisons | *            | 0.017           |   |
|                                                                                         | 200 ug/L vs. CTRL | -                              | **           | 0.005           |   |
|                                                                                         | <i>gsk3β</i>      | One-way ANOVA                  | *            | F=5.913 P=0.031 |   |
|                                                                                         | 100 ug/L vs. CTRL | Dunnett's multiple comparisons | ns           | 0.052           |   |
|                                                                                         | 200 ug/L vs. CTRL | -                              | *            | 0.046           |   |
|                                                                                         | <i>β-catenin</i>  | One-way ANOVA                  | **           | F=8.848 P=0.005 |   |
|                                                                                         | 100 ug/L vs. CTRL | Dunnett's multiple comparisons | ns           | 0.811           |   |
|                                                                                         | 200 ug/L vs. CTRL | -                              | **           | 0.004           |   |
| <b>Endogenous protein inhibitor of the Wnt/β-catenin signaling pathway (Figure. 1D)</b> | <i>ddk1</i>       | One-way ANOVA                  | ***          | F=101.3 P<0.001 | 3 |
|                                                                                         | 100 ug/L vs. CTRL | Dunnett's multiple comparisons | ***          | <0.001          |   |
|                                                                                         | 200 ug/L vs. CTRL | -                              | ***          | <0.001          |   |

|                                                                              |                   |                                |     |                 |    |
|------------------------------------------------------------------------------|-------------------|--------------------------------|-----|-----------------|----|
| Target genes regulated by $\beta$ -catenin/TCF transcription<br>(Figure. 1E) | <i>lef1</i>       | One-way ANOVA                  | *** | F=368.9 P<0.001 |    |
|                                                                              | 100 ug/L vs. CTRL | Dunnett's multiple comparisons | *** | <0.001          |    |
|                                                                              | 200 ug/L vs. CTRL | -                              | *** | <0.001          |    |
|                                                                              | <i>axin2</i>      | One-way ANOVA                  | *** | F=40.38 P<0.001 |    |
|                                                                              | 100 ug/L vs. CTRL | Dunnett's multiple comparisons | *   | 0.042           |    |
|                                                                              | 200 ug/L vs. CTRL | -                              | *** | <0.001          |    |
|                                                                              | <i>myca</i>       | One-way ANOVA                  | **  | F=21.62 P=0.002 |    |
|                                                                              | 100 ug/L vs. CTRL | Dunnett's multiple comparisons | *   | 0.022           |    |
|                                                                              | 200 ug/L vs. CTRL | -                              | **  | 0.001           |    |
|                                                                              | <i>ccnd</i>       | One-way ANOVA                  | *   | F=7.579 P=0.023 |    |
|                                                                              | 100 ug/L vs. CTRL | Dunnett's multiple comparisons | *   | 0.015           |    |
|                                                                              | 200 ug/L vs. CTRL | -                              | *   | 0.042           |    |
|                                                                              | <i>sp52</i>       | One-way ANOVA                  | *** | F=18.80 P<0.001 |    |
|                                                                              | 100 ug/L vs. CTRL | Dunnett's multiple comparisons | *   | 0.018           |    |
|                                                                              | 200 ug/L vs. CTRL | -                              | *** | <0.001          |    |
| Time to reach different period<br>(Figure. 2C)                               | 30%-epiboly       | One-way ANOVA                  | **  | F=3.934 P=0.002 |    |
|                                                                              | Cd                |                                |     |                 | 25 |
|                                                                              | CTRL vs. Cd       | Dunnett's multiple comparisons | *   | 0.023           | 22 |
|                                                                              | XAV939 vs. Cd     | -                              | ns  | 0.116           | 21 |
|                                                                              | TWS119 vs. Cd     | -                              | *   | 0.034           | 22 |
|                                                                              | Cd+XAV939 vs. Cd  | -                              | ns  | >0.999          | 23 |

|  |                  |                                |     |                 |    |
|--|------------------|--------------------------------|-----|-----------------|----|
|  | Cd+TWS119 vs. Cd | -                              | *   | 0.028           | 22 |
|  |                  |                                |     |                 |    |
|  | <b>bud</b>       | One-way ANOVA                  | *** | F=11.85 P<0.001 |    |
|  | Cd               |                                |     |                 | 23 |
|  | CTRL vs. Cd      | Dunnett's multiple comparisons | *** | <0.001          | 21 |
|  | XAV939 vs. Cd    | -                              | **  | 0.01            | 21 |
|  | TWS119 vs. Cd    | -                              | *** | <0.001          | 22 |
|  | Cd+XAV939 vs. Cd | -                              | ns  | 0.476           | 21 |
|  | Cd+TWS119 vs. Cd | -                              | *   | 0.025           | 22 |
|  |                  |                                |     |                 |    |
|  | <b>15-somite</b> | One-way ANOVA                  | *** | F=10.65 P<0.001 |    |
|  | Cd               |                                |     |                 | 23 |
|  | CTRL vs. Cd      | Dunnett's multiple comparisons | *** | <0.001          | 22 |
|  | XAV939 vs. Cd    | -                              | *   | 0.046           | 21 |
|  | TWS119 vs. Cd    | -                              | *** | <0.001          | 22 |
|  | Cd+XAV939 vs. Cd | -                              | ns  | 0.223           | 22 |
|  | Cd+TWS119 vs. Cd | -                              | *   | 0.022           | 22 |
|  |                  |                                |     |                 |    |
|  | <b>20-somite</b> | One-way ANOVA                  | *** | F=20.45 P<0.001 |    |
|  | Cd               |                                |     |                 | 24 |
|  | CTRL vs. Cd      | Dunnett's multiple comparisons | *** | <0.001          | 22 |
|  | XAV939 vs. Cd    | -                              | *** | <0.001          | 21 |

|                                                |                  |                                |     |                 |    |
|------------------------------------------------|------------------|--------------------------------|-----|-----------------|----|
|                                                | TWS119 vs. Cd    | -                              | *** | <0.001          | 22 |
|                                                | Cd+XAV939 vs. Cd | -                              | ns  | 0.244           | 22 |
|                                                | Cd+TWS119 vs. Cd | -                              | *** | <0.001          | 22 |
| Heart rate at 5 dpf (Figure. 2D)               |                  | One-way ANOVA                  | *** | F=26.14 P<0.001 | 15 |
|                                                | Cd               |                                |     |                 |    |
|                                                | CTRL vs. Cd      | Dunnett's multiple comparisons | *** | <0.001          |    |
|                                                | XAV939 vs. Cd    | -                              | *** | <0.001          |    |
|                                                | TWS119 vs. Cd    | -                              | *** | <0.001          |    |
|                                                | Cd+XAV939 vs. Cd | -                              | *   | 0.022           |    |
|                                                | Cd+TWS119 vs. Cd | -                              | *   | 0.015           |    |
| Embryo malformation rate at 7 dpf (Figure. 2E) |                  | One-way ANOVA                  | *** | F=37.54 P<0.001 | 10 |
|                                                | Cd               |                                |     |                 |    |
|                                                | CTRL vs. Cd      | Dunnett's multiple comparisons | *** | <0.001          |    |
|                                                | XAV939 vs. Cd    | -                              | *** | <0.001          |    |
|                                                | TWS119 vs. Cd    | -                              | *** | <0.001          |    |
|                                                | Cd+XAV939 vs. Cd | -                              | *   | 0.034           |    |
|                                                | Cd+TWS119 vs. Cd | -                              | *   | 0.023           |    |
| Body length at 6 dpf (Figure. 2F)              |                  | One-way ANOVA                  | *** | F=28.99 P<0.001 |    |
|                                                | Cd               |                                |     |                 | 10 |
|                                                | CTRL vs. Cd      | Dunnett's multiple comparisons | *** | <0.001          | 10 |
|                                                | XAV939 vs. Cd    | -                              | *** | <0.001          | 10 |

|                                                                |                  |                                |     |                 |    |
|----------------------------------------------------------------|------------------|--------------------------------|-----|-----------------|----|
|                                                                | TWS119 vs. Cd    | -                              | *** | <0.001          | 14 |
|                                                                | Cd+XAV939 vs. Cd | -                              | *   | 0.015           | 10 |
|                                                                | Cd+TWS119 vs. Cd | -                              | *   | 0.023           | 11 |
| Distance moved of spontaneous activity of larvae (Figure. 3C)  |                  | One-way ANOVA                  | *** | F=14.35 P<0.001 |    |
|                                                                | Cd               |                                |     |                 | 18 |
|                                                                | CTRL vs. Cd      | Dunnett's multiple comparisons | *** | <0.001          | 15 |
|                                                                | XAV939 vs. Cd    | -                              | *** | <0.001          | 18 |
|                                                                | TWS119 vs. Cd    | -                              | *** | <0.001          | 18 |
|                                                                | Cd+XAV939 vs. Cd | -                              | ns  | >0.999          | 21 |
|                                                                | Cd+TWS119 vs. Cd | -                              | *   | 0.015           | 18 |
| Movement time of spontaneous activity of larvae (Figure. 3D)   |                  | One-way ANOVA                  | *** | F=17.42 P<0.001 |    |
|                                                                | Cd               |                                |     |                 | 18 |
|                                                                | CTRL vs. Cd      | Dunnett's multiple comparisons | *** | <0.001          | 15 |
|                                                                | XAV939 vs. Cd    | -                              | *** | <0.001          | 17 |
|                                                                | TWS119 vs. Cd    | -                              | *** | <0.001          | 12 |
|                                                                | Cd+XAV939 vs. Cd | -                              | ns  | >0.999          | 21 |
|                                                                | Cd+TWS119 vs. Cd | -                              | **  | 0.007           | 17 |
| Mean turn angle of spontaneous activity of larvae (Figure. 3E) |                  | One-way ANOVA                  | *** | F=12.40 P<0.001 |    |
|                                                                | Cd               |                                |     |                 | 17 |
|                                                                | CTRL vs. Cd      | Dunnett's multiple comparisons | *** | <0.001          | 15 |
|                                                                | XAV939 vs. Cd    | -                              | *** | <0.001          | 18 |



|                                                                    |                  |                                |     |                 |    |
|--------------------------------------------------------------------|------------------|--------------------------------|-----|-----------------|----|
|                                                                    | TWS119 vs. Cd    | -                              | **  | 0.004           | 11 |
|                                                                    | Cd+XAV939 vs. Cd | -                              | ns  | 0.922           | 21 |
|                                                                    | Cd+TWS119 vs. Cd | -                              | **  | 0.005           | 17 |
| Distance moved of larvae under light-dark stimulation (Figure. 3H) |                  | One-way ANOVA                  | *** | F=39.43 P<0.001 |    |
|                                                                    | Cd               |                                |     |                 | 18 |
|                                                                    | CTRL vs. Cd      | Dunnett's multiple comparisons | *** | <0.001          | 24 |
|                                                                    | XAV939 vs. Cd    | -                              | *** | <0.001          | 24 |
|                                                                    | TWS119 vs. Cd    | -                              | *** | <0.001          | 21 |
|                                                                    | Cd+XAV939 vs. Cd | -                              | ns  | 0.067           | 17 |
|                                                                    | Cd+TWS119 vs. Cd | -                              | **  | 0.003           | 24 |
| Movement time of larvae under light-dark stimulation (Figure. 3I)  |                  | One-way ANOVA                  | *** | F=38.91 P<0.001 |    |
|                                                                    | Cd               |                                |     |                 | 24 |
|                                                                    | CTRL vs. Cd      | Dunnett's multiple comparisons | *** | <0.001          | 24 |
|                                                                    | XAV939 vs. Cd    | -                              | *** | <0.001          | 24 |
|                                                                    | TWS119 vs. Cd    | -                              | *** | <0.001          | 21 |
|                                                                    | Cd+XAV939 vs. Cd | -                              | ns  | 0.297           | 24 |
|                                                                    | Cd+TWS119 vs. Cd | -                              | *   | 0.025           | 24 |
| Mean turn angle under light-dark stimulation (Figure. 3J)          |                  | One-way ANOVA                  | *** | F=23.20 P<0.001 |    |
|                                                                    | Cd               |                                |     |                 | 24 |
|                                                                    | CTRL vs. Cd      | Dunnett's multiple comparisons | *** | <0.001          | 24 |
|                                                                    | XAV939 vs. Cd    | -                              | *** | <0.001          | 24 |

|                                                                  |                  |                             |     |                 |    |
|------------------------------------------------------------------|------------------|-----------------------------|-----|-----------------|----|
|                                                                  | TWS119 vs. Cd    | -                           | *** | <0.001          | 18 |
|                                                                  | Cd+XAV939 vs. Cd | -                           | ns  | 0.208           | 24 |
|                                                                  | Cd+TWS119 vs. Cd | -                           | *** | <0.001          | 24 |
| <b>Distance moved under vibration stimulation (Figure 3M)</b>    |                  | Kruskal-Wallis              | *** | H=41.33 P<0.001 |    |
|                                                                  | Cd               |                             |     |                 | 20 |
|                                                                  | CTRL vs. Cd      | Dunn's multiple comparisons | *   | 0.01            | 20 |
|                                                                  | TWS119 vs. Cd    | -                           | *   | 0.024           | 8  |
|                                                                  | XAV939 vs. Cd    | -                           | *   | 0.011           | 24 |
|                                                                  | Cd+TWS119 vs. Cd | -                           | **  | 0.009           | 21 |
|                                                                  | Cd+XAV939 vs. Cd | -                           | ns  | 0.81            | 22 |
| <b>Movement duration under vibration stimulation (Figure 3N)</b> |                  | Kruskal-Wallis              | *** | H=41.53 P<0.001 |    |
|                                                                  | Cd               |                             |     |                 | 23 |
|                                                                  | CTRL vs. Cd      | Dunn's multiple comparisons | **  | 0.005           | 21 |
|                                                                  | TWS119 vs. Cd    | -                           | *   | 0.041           | 8  |
|                                                                  | XAV939 vs. Cd    | -                           | *   | 0.019           | 23 |
|                                                                  | Cd+TWS119 vs. Cd | -                           | *   | 0.035           | 19 |
|                                                                  | Cd+XAV939 vs. Cd | -                           | ns  | 0.485           | 24 |
| <b>Mean turn angle under vibration stimulation (Figure 3O)</b>   |                  | Kruskal-Wallis              | *** | H=32.6 P<0.001  |    |
|                                                                  | Cd               |                             |     |                 | 21 |
|                                                                  | CTRL vs. Cd      | Dunn's multiple comparisons | *   | 0.045           | 18 |
|                                                                  | TWS119 vs. Cd    | -                           | *   | 0.039           | 8  |

|                                                |                  |                                |                    |                 |    |
|------------------------------------------------|------------------|--------------------------------|--------------------|-----------------|----|
|                                                | XAV939 vs. Cd    | -                              | *                  | 0.019           | 24 |
|                                                | Cd+TWS119 vs. Cd | -                              | **                 | 0.003           | 22 |
|                                                | Cd+XAV939 vs. Cd | -                              | ns                 | >.999           | 17 |
| The mean optical density at 6 dpf (Figure. 4B) |                  | One-way ANOVA                  | ***                | F=41.13 P<0.001 |    |
|                                                | Cd               |                                |                    |                 | 8  |
|                                                | CTRL vs. Cd      | Dunnett's multiple comparisons | ***                | <0.001          | 11 |
|                                                | Cd+TWS119 vs. Cd | -                              | ***                | <0.001          | 10 |
|                                                | Cd+XAV939 vs. Cd | -                              | ns                 | 0.079           | 9  |
| Telencephalon proportion (Figure. 4D)          |                  | One-way ANOVA                  | ***                | F=13.51 P<0.001 |    |
|                                                | Cd               |                                |                    |                 | 7  |
|                                                | CTRL vs. Cd      | Dunnett's multiple comparisons | *                  | 0.026           |    |
|                                                | Cd+TWS119 vs. Cd | -                              | *                  | 0.019           |    |
|                                                | Cd+XAV939 vs. Cd | -                              | *                  | 0.048           |    |
| Neuron number/mm <sup>2</sup> (Figure. 4F)     |                  | One-way ANOVA                  | ***                | F=69.66 P<0.001 |    |
|                                                | Cd               |                                |                    |                 | 8  |
|                                                | CTRL vs. Cd      | Dunnett's multiple comparisons | ***                | <0.001          |    |
|                                                | Cd+TWS119 vs. Cd | -                              | **                 | 0.001           |    |
|                                                | Cd+XAV939 vs. Cd | -                              | **                 | 0.008           |    |
| Filament length (Figure. 4H)                   |                  | One-way ANOVA                  | F=4.995<br>P=0.012 | *               |    |
|                                                | Cd               |                                |                    |                 | 5  |

|                                             |                  |                                |                    |                 |   |
|---------------------------------------------|------------------|--------------------------------|--------------------|-----------------|---|
|                                             | CTRL vs. Cd      | Dunnett's multiple comparisons | 0.957              | ns              |   |
|                                             | Cd+TWS119 vs. Cd | -                              | 0.233              | ns              |   |
|                                             | Cd+XAV939 vs. Cd | -                              | 0.022              | *               |   |
| Branch number (Figure. 4I)                  |                  | One-way ANOVA                  | F=4.509<br>P=0.018 | *               | 5 |
|                                             | Cd               | Dunnett's multiple comparisons |                    |                 |   |
|                                             | CTRL vs. Cd      |                                | 0.95               | ns              |   |
|                                             | Cd+TWS119 vs. Cd | -                              | 0.212              | ns              |   |
|                                             | Cd+XAV939 vs. Cd | -                              | 0.036              | *               |   |
|                                             |                  |                                |                    |                 |   |
| Neurodevelopment related genes (Figure. 4J) | <i>a1-tublin</i> | One-way ANOVA                  | ***                | F=27.18 P<0.001 | 3 |
|                                             | CTRL vs. Cd      | Dunnett's multiple comparisons | **                 | 0.003           |   |
|                                             | Cd+TWS119 vs. Cd | -                              | *                  | 0.015           |   |
|                                             | Cd+XAV939 vs. Cd | -                              | *                  | 0.036           |   |
|                                             | <i>syn2a</i>     | One-way ANOVA                  | ***                | F=17.32 P<0.001 |   |
|                                             | CTRL vs. Cd      | Dunnett's multiple comparisons | *                  | 0.031           |   |
|                                             | Cd+TWS119 vs. Cd | -                              | **                 | 0.001           |   |
|                                             | Cd+XAV939 vs. Cd | -                              | ns                 | 0.748           |   |
|                                             | <i>elavl3</i>    | One-way ANOVA                  | ***                | F=35.02 P<0.001 |   |
|                                             | CTRL vs. Cd      | Dunnett's multiple comparisons | ***                | <0.001          |   |
|                                             | Cd+TWS119 vs. Cd | -                              | ***                | <0.001          |   |
|                                             | Cd+XAV939 vs. Cd | -                              | ns                 | 0.818           |   |

|                                      |                      |                                |     |                 |   |
|--------------------------------------|----------------------|--------------------------------|-----|-----------------|---|
|                                      | <b><i>nestin</i></b> | One-way ANOVA                  | *   | F=5.954 P=0.013 |   |
|                                      | CTRL vs. Cd          | Dunnett's multiple comparisons | *   | 0.049           |   |
|                                      | Cd+TWS119 vs. Cd     | -                              | *   | 0.011           |   |
|                                      | Cd+XAV939 vs. Cd     | -                              | ns  | 0.873           |   |
|                                      | <b><i>gap43</i></b>  | One-way ANOVA                  | *** | F=61.99 P<0.001 |   |
|                                      | CTRL vs. Cd          | Dunnett's multiple comparisons | **  | 0.004           |   |
|                                      | Cd+TWS119 vs. Cd     | -                              | ns  | 0.135           |   |
|                                      | Cd+XAV939 vs. Cd     | -                              | **  | 0.003           |   |
| Cell cycle distribution (Figure. 5B) | <b>G1/G0</b>         | One-way ANOVA                  | *** | F=22.29 P<0.001 | 3 |
|                                      | Cd                   |                                |     |                 |   |
|                                      | CTRL vs. Cd          | Dunnett's multiple comparisons | *   | 0.025           |   |
|                                      | Cd+TWS119 vs. Cd     | -                              | *   | 0.043           |   |
|                                      | Cd+XAV939 vs. Cd     | -                              | *   | 0.012           |   |
|                                      |                      |                                |     |                 |   |
|                                      | <b>S</b>             | One-way ANOVA                  | **  | F=13.14 P=0.002 |   |
|                                      | Cd                   |                                |     |                 |   |
|                                      | CTRL vs. Cd          | Dunnett's multiple comparisons | *   | 0.015           |   |
|                                      | Cd+TWS119 vs. Cd     | -                              | *   | 0.028           |   |
|                                      | Cd+XAV939 vs. Cd     | -                              | ns  | 0.329           |   |
|                                      |                      |                                |     |                 |   |
|                                      | <b>G2/M</b>          | One-way ANOVA                  | *** | F=30.26 P<0.001 |   |
|                                      | Cd                   |                                |     |                 |   |

|                                                                 |                  |                                |     |                 |    |
|-----------------------------------------------------------------|------------------|--------------------------------|-----|-----------------|----|
|                                                                 | CTRL vs. Cd      | Dunnett's multiple comparisons | *** | <0.001          |    |
|                                                                 | Cd+TWS119 vs. Cd | -                              | **  | 0.002           |    |
|                                                                 | Cd+XAV939 vs. Cd | -                              | ns  | 0.204           |    |
| The number of AO positive cells (Figure. 5D)                    |                  | One-way ANOVA                  | *** | F=199.9 P<0.001 | 10 |
|                                                                 | Cd               |                                |     |                 |    |
|                                                                 | CTRL vs. Cd      | Dunnett's multiple comparisons | *** | <0.001          |    |
|                                                                 | Cd+TWS119 vs. Cd | -                              | *** | <0.001          |    |
|                                                                 | Cd+XAV939 vs. Cd | -                              | **  | 0.001           |    |
| The expression profiles of apoptotic related genes (Figure. 5E) | <i>bcl</i>       | One-way ANOVA                  | *** | F=17.71 P<0.001 | 3  |
|                                                                 | Cd               |                                |     |                 |    |
|                                                                 | CTRL vs. Cd      | Dunnett's multiple comparisons | *   | 0.021           |    |
|                                                                 | Cd+TWS119 vs. Cd | -                              | *   | 0.014           |    |
|                                                                 | Cd+XAV939 vs. Cd | -                              | *   | 0.044           |    |
|                                                                 | <i>p53</i>       | One-way ANOVA                  | *** | F=40.71 P<0.001 |    |
|                                                                 | Cd               |                                |     |                 |    |
|                                                                 | CTRL vs. Cd      | Dunnett's multiple comparisons | **  | 0.003           |    |
|                                                                 | Cd+TWS119 vs. Cd | -                              | **  | 0.004           |    |
|                                                                 | Cd+XAV939 vs. Cd | -                              | *** | <0.001          |    |
|                                                                 | <i>bax</i>       | One-way ANOVA                  | *** | F=68.49 P<0.001 |    |
|                                                                 | Cd               |                                |     |                 |    |
|                                                                 | CTRL vs. Cd      | Dunnett's multiple comparisons | *** | <0.001          |    |

|                                          |                  |                                |     |                 |   |
|------------------------------------------|------------------|--------------------------------|-----|-----------------|---|
|                                          | Cd+TWS119 vs. Cd | -                              | *** | <0.001          |   |
|                                          | Cd+XAV939 vs. Cd | -                              | ns  | 0.368           |   |
|                                          | <b>cas8</b>      | One-way ANOVA                  | *** | F=89.78 P<0.001 |   |
|                                          | Cd               |                                |     |                 |   |
|                                          | CTRL vs. Cd      | Dunnett's multiple comparisons | *** | <0.001          |   |
|                                          | Cd+TWS119 vs. Cd | -                              | *** | <0.001          |   |
|                                          | Cd+XAV939 vs. Cd | -                              | ns  | 0.216           |   |
|                                          | <b>cas3a</b>     | One-way ANOVA                  | *** | F=27.86 P<0.001 |   |
|                                          | Cd               |                                |     |                 |   |
|                                          | CTRL vs. Cd      | Dunnett's multiple comparisons | *   | 0.045           |   |
|                                          | Cd+TWS119 vs. Cd | -                              | **  | 0.008           |   |
|                                          | Cd+XAV939 vs. Cd | -                              | *   | 0.018           |   |
| <b>Microglia surface (Figure. 6B)</b>    |                  | One-way ANOVA                  | *** | F=22.86 P<0.001 |   |
|                                          | Cd               |                                |     |                 | 8 |
|                                          | CTRL vs. Cd      | Dunnett's multiple comparisons | *** | <0.001          | 8 |
|                                          | Cd+TWS119 vs. Cd | -                              | **  | 0.008           | 8 |
|                                          | Cd+XAV939 vs. Cd | -                              | *   | 0.034           | 7 |
| <b>Microglia Sphericity (Figure. 6C)</b> |                  | One-way ANOVA                  | *** | F=8.484 P<0.001 |   |
|                                          | Cd               |                                |     |                 | 8 |
|                                          | CTRL vs. Cd      | Dunnett's multiple comparisons | *** | <0.001          | 8 |
|                                          | Cd+TWS119 vs. Cd | -                              | **  | 0.003           | 8 |

|                                                      |                  |                                |     |                 |    |
|------------------------------------------------------|------------------|--------------------------------|-----|-----------------|----|
|                                                      | Cd+XAV939 vs. Cd | -                              | ns  | 0.85            | 7  |
| Microglia Volume (Figure. 6D)                        |                  | One-way ANOVA                  | *** | F=23.20 P<0.001 |    |
|                                                      | Cd               |                                |     |                 | 8  |
|                                                      | CTRL vs. Cd      | Dunnett's multiple comparisons | *** | <0.001          | 8  |
|                                                      | Cd+TWS119 vs. Cd | -                              | *   | 0.021           | 8  |
|                                                      | Cd+XAV939 vs. Cd | -                              | *   | 0.011           | 7  |
| Number of microglia in optic tectum (Figure. 6F)     |                  | One-way ANOVA                  | *** | F=12.43 P<0.001 |    |
|                                                      | Cd               |                                |     |                 | 11 |
|                                                      | CTRL vs. Cd      | Dunnett's multiple comparisons | *** | <0.001          | 8  |
|                                                      | Cd+TWS119 vs. Cd | -                              | **  | 0.001           | 8  |
|                                                      | Cd+XAV939 vs. Cd | -                              | ns  | 0.997           | 8  |
| Microglia and inflammation related genes (Figure 6G) | <i>irf8</i>      | One-way ANOVA                  | *** | F=24.16 P<0.001 | 3  |
|                                                      | Cd               |                                |     |                 |    |
|                                                      | CTRL vs. Cd      | Dunnett's multiple comparisons | **  | 0.002           |    |
|                                                      | Cd+TWS119 vs. Cd | -                              | **  | 0.006           |    |
|                                                      | Cd+XAV939 vs. Cd | -                              | ns  | 0.228           |    |
|                                                      | <i>apoeb</i>     | One-way ANOVA                  | *** | F=77.87 P<0.001 |    |
|                                                      | Cd               |                                |     |                 |    |
|                                                      | CTRL vs. Cd      | Dunnett's multiple comparisons | *** | <0.001          |    |
|                                                      | Cd+TWS119 vs. Cd | -                              | *** | <0.001          |    |
|                                                      | Cd+XAV939 vs. Cd | -                              | ns  | 0.482           |    |



|  |                  |                                |     |                 |  |
|--|------------------|--------------------------------|-----|-----------------|--|
|  | <i>tnf-a</i>     | One-way ANOVA                  | *** | F=33.02 P<0.001 |  |
|  | Cd               |                                |     |                 |  |
|  | CTRL vs. Cd      | Dunnett's multiple comparisons | *** | <0.001          |  |
|  | Cd+TWS119 vs. Cd | -                              | *** | <0.001          |  |
|  | Cd+XAV939 vs. Cd | -                              | ns  | 0.062           |  |

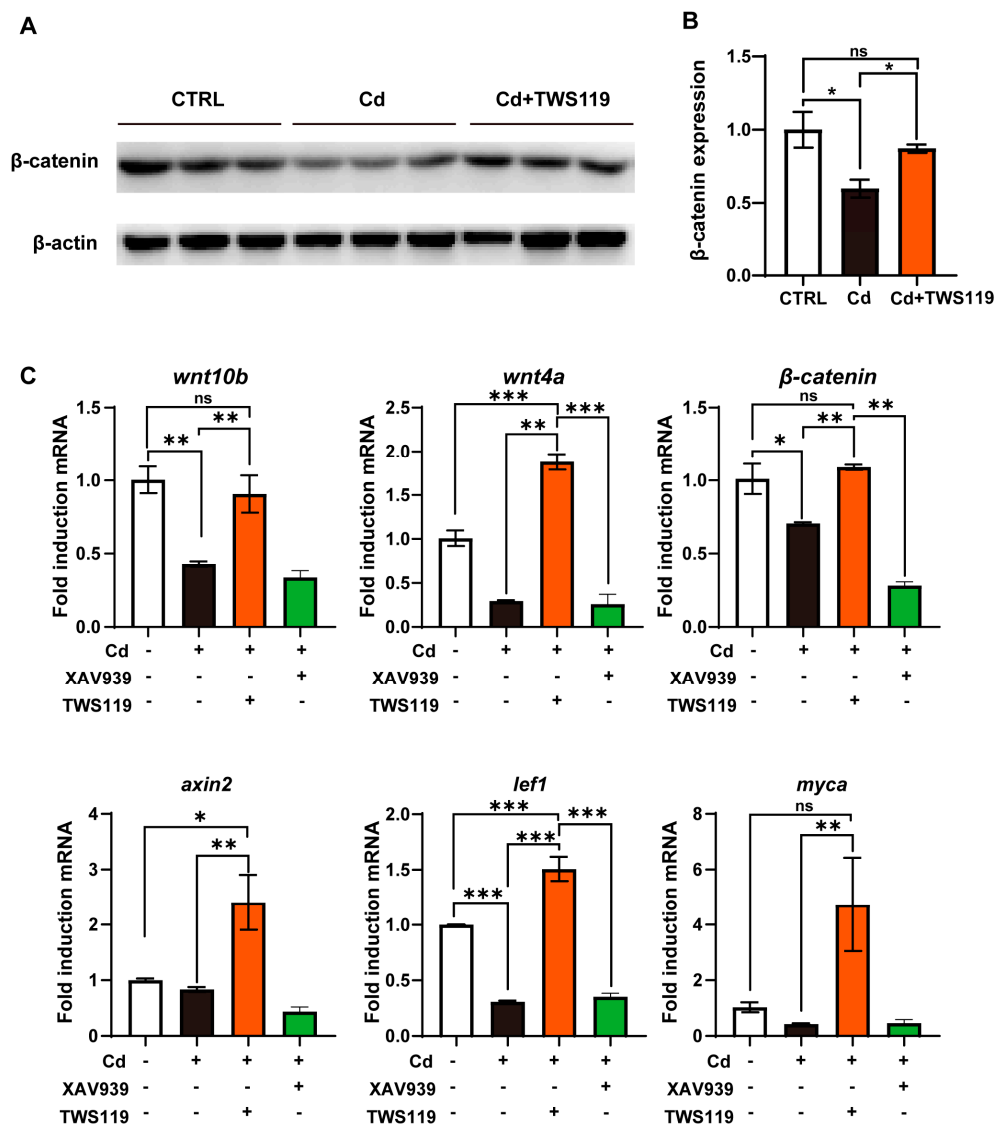

**Figure S1.** Effects of TWS119 and XAV939 on Wnt signaling pathway related proteins and genes.

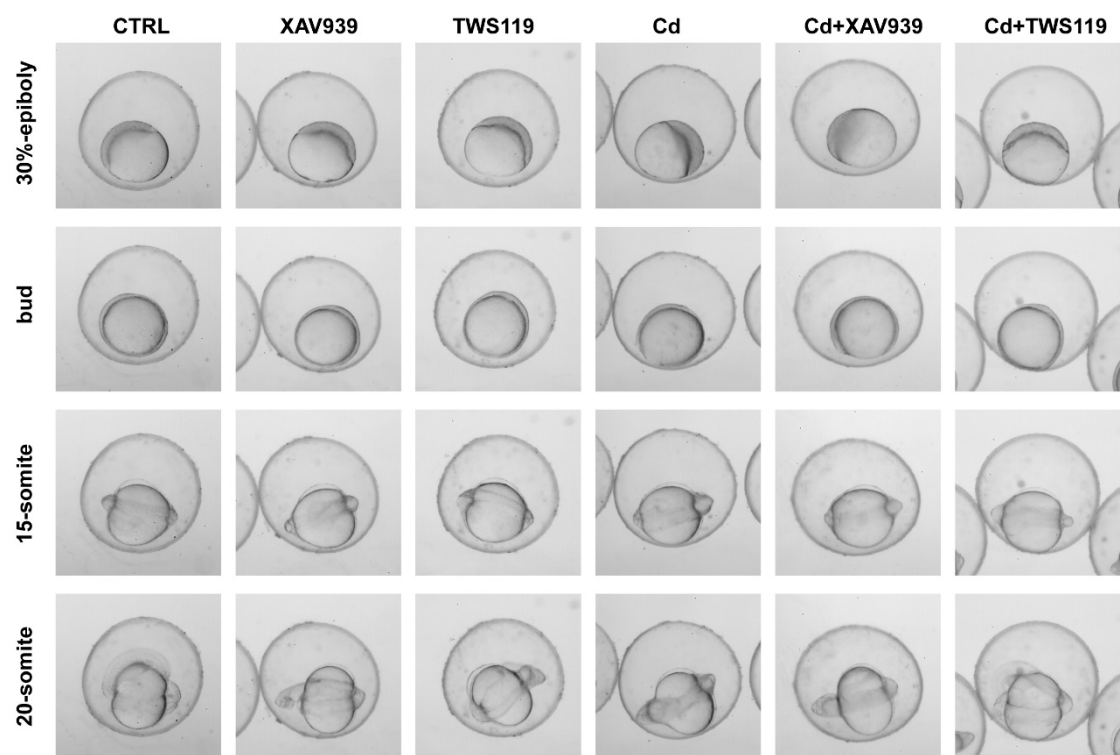

**Figure S2.** Representative images of high-throughput time-lapse tracking of zebrafish early development. See also **Video S1**.

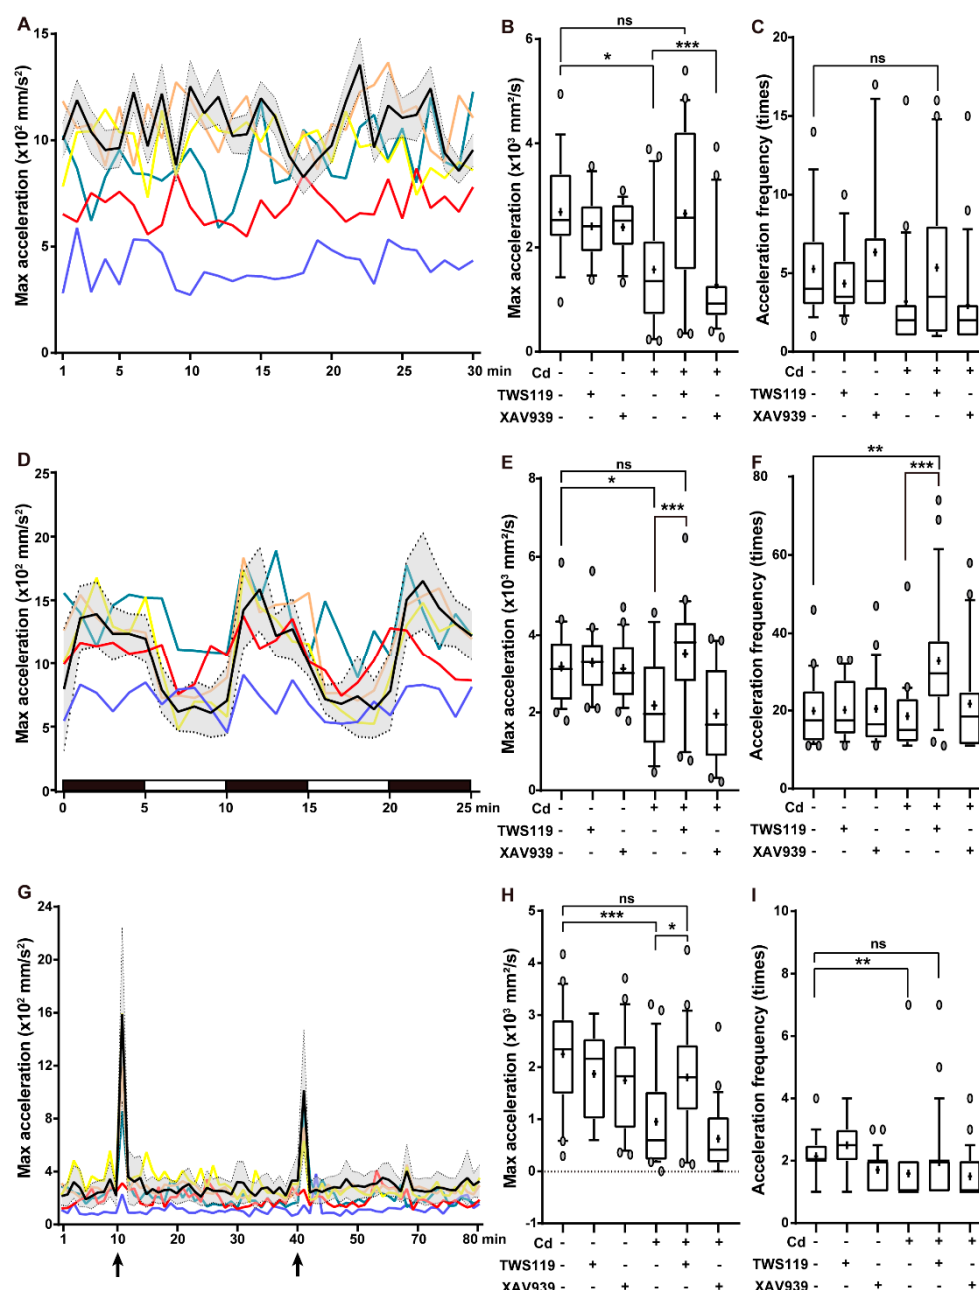

**Figure S3. Zebrafish locomotor activities and reactivity to light-dark/vibration stimulation in different groups.** Swimming distance, velocity of 6 dpf zebrafish larvae in 30 minutes (A-C), subjected to light-dark cycles (D-F) and vibration stimulation in every 30 s (as indicated by the arrows below) (G-I). Left panels were plotted in 5 min or 10 s time bin and right panels were plotted with average values of the whole-tracking. Each experiment was performed independently three times. The values are presented as median (line) and mean (+), while whiskers show 90% confidence levels in boxplots. Nonparametric Kruskal-Wallis test or one-way ANOVA followed by multiple comparisons test results are reported in **Table S2**. Significant differences are indicated by asterisks (\*\*\*p < 0.001, \*\*p < 0.01, \*p < 0.05).

**Video S1.** High-throughput time-lapse imaging to track the early development of zebrafish embryos.
